# Supplementary material
Source: publisher site journal article supplement (https://www.dovepress.com/article/357996)
Supplement: Supplementary file 1 [file get_supplementary_file.php]

**Supplementary Table 1. The reasons for not taking CCTA and Exercise ECG**

|  | n |
| --- | --- |
| **No CCTA** | 40 |
| Heavy coronary calcification of previous CCTA | 14 |
| Arrhythmia | 3 |
| Poor breathing coordination | 1 |
| Combine right renal artery stenosis | 1 |
| Clinician's decision based on symptom and Exercise ECG | 18 |
| Elevated serum creatinine | 3 |
| **No Exercise ECG** | 20 |
| Pacemaker implanted | 2 |
| Poor activity tolerance | 6 |
| Knee joint discomfort | 10 |
| Left atrial thrombus | 1 |
| Refusal by patients | 1 |
| **No CCTA and no Exercise ECG** | 2 |
| Knee joint discomfort and arrhythmia | 1 |
| Knee joint discomfort and heavy coronary calcification | 1 |

**Abbreviations:** CCTA, coronary computed tomography angiography; ECG, electrocardiogram.


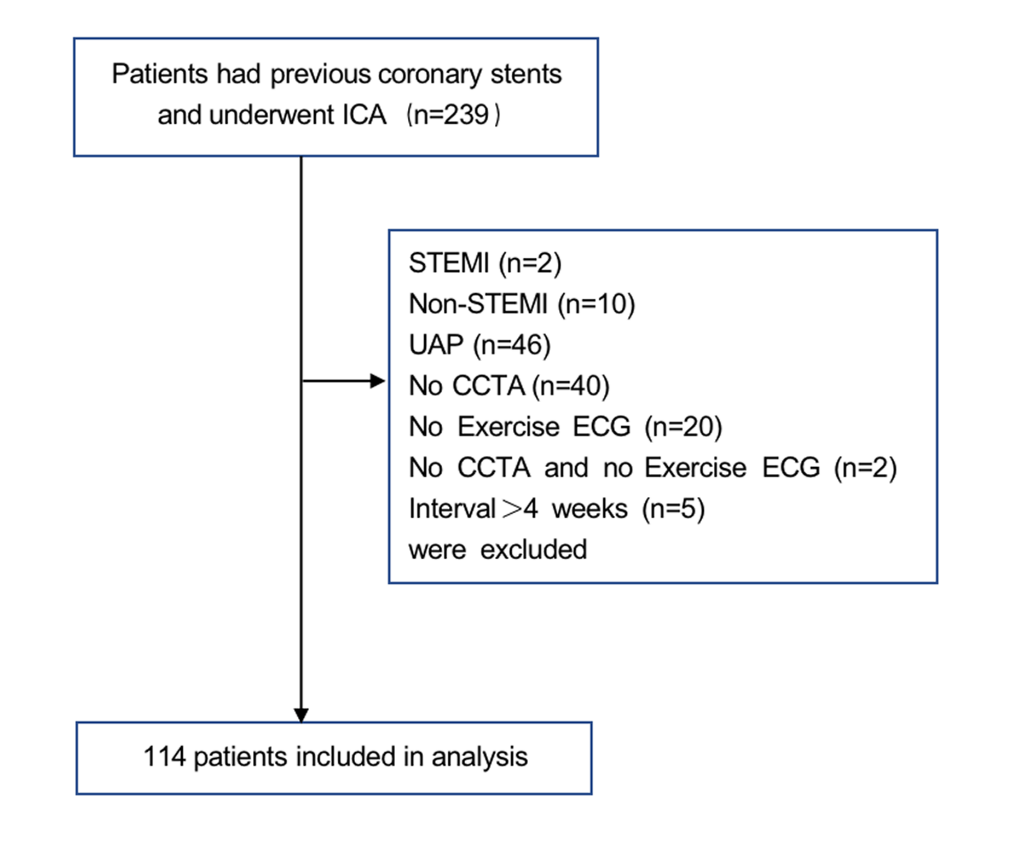


**Supplementary Figure 1. A flowchart of the procedure for patient selection.**

**Abbreviations:** CCTA, coronary computed tomography angiography; ECG, electrocardiogram; ICA, invasive coronary angiography; STEMI, ST-elevated myocardial infarction; UAP, unstable angina pectoris.
